# Supplementary material for: Jinlida Granules Reduce Obesity in db/db Mice by Activating Beige Adipocytes
Source: Hindawi journal article supplement (doi:10.1155/2022/4483009), 2022-01-01
Supplement: f1 [file 4483009.f1.pdf]

**A**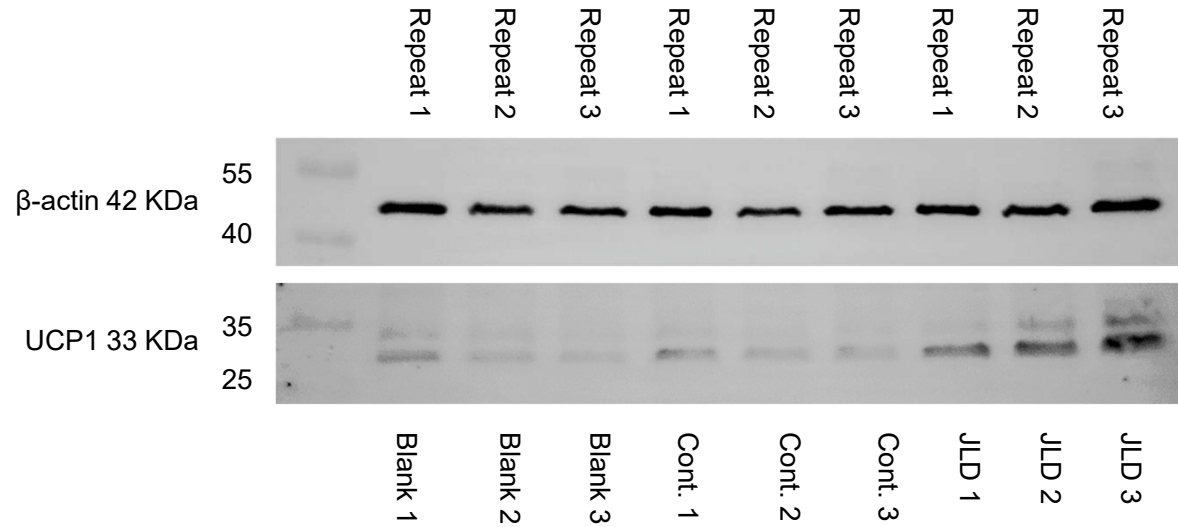**B**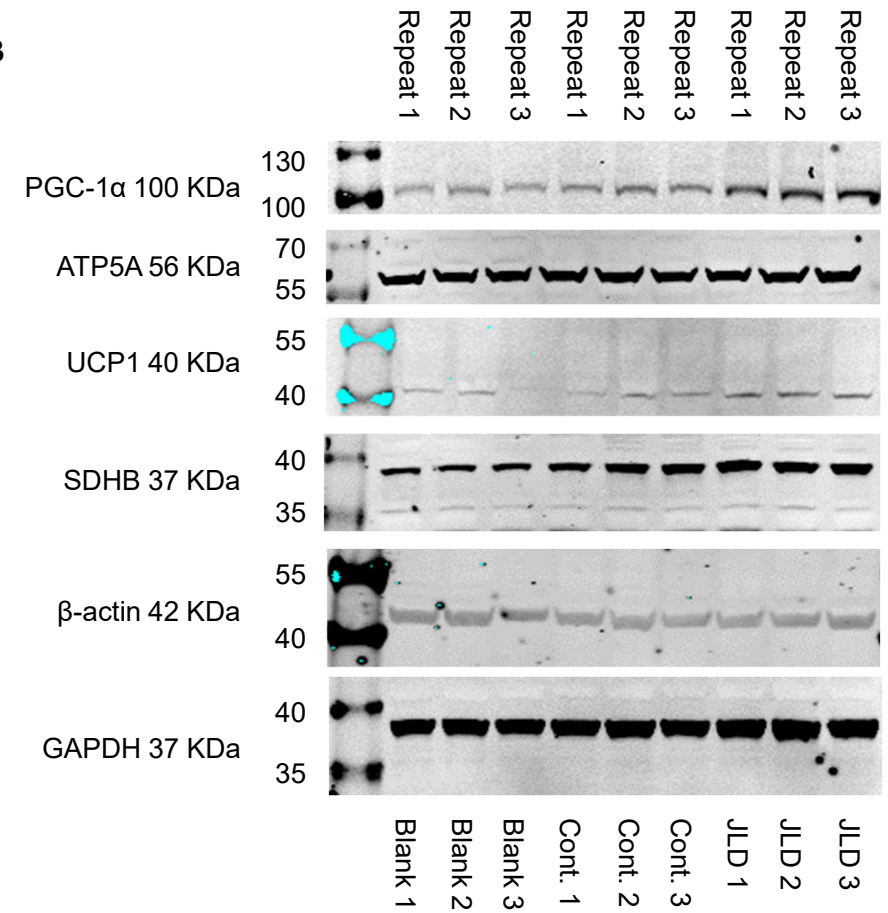

**S1\_raw\_images.** (A) The whole blot after cutting membrane at molecular weight 40~55 kDa and 25~35 kDa for  $\beta$ -actin (42 kDa) and UCP1 (33 kDa) respectively. (B) The whole blot after cutting membrane at molecular weight 100~130 kDa, 55~70kDa, 40~55 kDa, 40~55 kDa, 35~40 kDa, and 35~40 kDa for PGC-1 $\alpha$  (100 kDa), ATP5A (56 kDa), UCP1 (40kDa), SDHB (37 kDa),  $\beta$ -actin (42 kDa) and GAPDH (37 kDa) respectively.
